# Supplementary material for: Establishment of Human-Induced Pluripotent Stem Cell-Derived Neurons—A Promising In Vitro Model for a Molecular Study of Rabies Virus and Host Interaction
Source: MDPI journal article supplement (doi:10.3390/ijms222111986), 2021-11-05
Supplement: s1 [file s1]

**Table S1. Gene ontology of DEPs associated with host immune response and signal transduction**

| Time point<br>(hpi) | GO                                                                              | User ID | Gene symbol | Gene name                                                      | Fold<br>change |
|---------------------|---------------------------------------------------------------------------------|---------|-------------|----------------------------------------------------------------|----------------|
| 8                   | GO:0071706<br>tumor necrosis<br>factor<br>superfamily<br>cytokine<br>production | P01579  | IFNG        | interferon gamma                                               | -1.41          |
|                     |                                                                                 | P20749  | BCL3        | BCL3, transcription coactivator                                | -1.44          |
|                     |                                                                                 | Q8IUC6  | TICAM1      | toll like receptor adaptor molecule 1                          | -1.38          |
|                     |                                                                                 | Q9NUY8  | TBC1D23     | TBC1 domain family member 23                                   | -1.35          |
|                     |                                                                                 |         |             |                                                                |                |
|                     | GO:0031929<br>TOR signaling                                                     | O43156  | TTI1        | TELO2 interacting protein 1                                    | -4.00          |
|                     |                                                                                 | P49815  | TSC2        | TSC complex subunit 2                                          | -1.27          |
|                     |                                                                                 | Q8IW41  | MAPKAPK5    | mitogen-activated protein kinase-activated<br>protein kinase 5 | -2.30          |
|                     |                                                                                 | Q8TEV9  | SMCR8       | Smith-Magenis syndrome chromosome<br>region, candidate 8       | -2.87          |
|                     |                                                                                 | Q9BXL7  | CARD11      | caspase recruitment domain family member<br>11                 | -1.10          |
|                     | GO:0002285<br>lymphocyte<br>activation<br>involved in<br>immune<br>response     | P01579  | IFNG        | interferon gamma                                               | -1.41          |
|                     |                                                                                 | P20749  | BCL3        | BCL3, transcription coactivator                                | -1.44          |
|                     |                                                                                 | Q5UIP0  | RIF1        | replication timing regulatory factor 1                         | -2.53          |
|                     |                                                                                 | Q7KZ85  | SUPT6H      | SPT6 homolog, histone chaperone                                | -1.39          |
|                     |                                                                                 |         |             |                                                                |                |
|                     | GO:0002440<br>production of<br>molecular<br>mediator of<br>immune<br>response   | Q5UIP0  | RIF1        | replication timing regulatory factor 1                         | -2.53          |
|                     |                                                                                 | Q7KZ85  | SUPT6H      | SPT6 homolog, histone chaperone                                | -1.39          |
|                     |                                                                                 | Q8IUC6  | TICAM1      | toll like receptor adaptor molecule 1                          | -1.38          |
|                     |                                                                                 | Q8N884  | CGAS        | cyclic GMP-AMP synthase                                        | -2.99          |
|                     |                                                                                 | Q9BXL7  | CARD11      | caspase recruitment domain family member<br>11                 | -1.10          |
|                     | GO:0002449<br>lymphocyte<br>mediated<br>immunity                                | P07437  | TUBB        | tubulin beta class I                                           | -1.36          |
|                     |                                                                                 | P11226  | MBL2        | mannose binding lectin 2                                       | -1.45          |
|                     |                                                                                 | P20749  | BCL3        | BCL3, transcription coactivator                                | -1.44          |
|                     |                                                                                 | Q5UIP0  | RIF1        | replication timing regulatory factor 1                         | -2.53          |
|                     |                                                                                 | Q7KZ85  | SUPT6H      | SPT6 homolog, histone chaperone                                | -1.39          |
|                     | GO:0009615<br>response to<br>virus                                              | P01579  | IFNG        | interferon gamma                                               | -1.41          |
|                     |                                                                                 | P20749  | BCL3        | BCL3, transcription coactivator                                | -1.44          |
|                     |                                                                                 | P78563  | ADARB1      | adenosine deaminase, RNA specific B1                           | -1.31          |
|                     |                                                                                 | Q04912  | MST1R       | macrophage stimulating 1 receptor                              | -3.80          |
|                     |                                                                                 | Q12906  | ILF3        | interleukin enhancer binding factor 3                          | -2.79          |
|                     |                                                                                 | Q8IUC6  | TICAM1      | toll like receptor adaptor molecule 1                          | -1.38          |
|                     |                                                                                 | Q8N884  | CGAS        | cyclic GMP-AMP synthase                                        | -2.99          |
|                     |                                                                                 | Q9NW08  | POLR3B      | RNA polymerase III subunit B                                   | -2.09          |
|                     |                                                                                 | Q9NZM5  | NOP53       | NOP53 ribosome biogenesis factor                               | -1.89          |

**Table S1. Gene ontology of DEPs associated with host immune response and signal transduction (Continued)**

| Time point (hpi) | GO                                                      | User ID                    | Gene symbol | Gene name                                                                | Fold change      |
|------------------|---------------------------------------------------------|----------------------------|-------------|--------------------------------------------------------------------------|------------------|
| 8                | GO:0072331<br>signal transduction by p53 class mediator | P20749                     | BCL3        | BCL3, transcription coactivator                                          | -1.44            |
|                  |                                                         | Q8IW41                     | MAPKAPK5    | mitogen-activated protein kinase-activated protein kinase 5              | -2.30            |
|                  |                                                         | Q92630                     | DYRK2       | dual specificity tyrosine phosphorylation regulated kinase 2             | -1.94            |
|                  |                                                         | Q92750                     | TAF4B       | TATA-box binding protein associated factor 4b                            | -1.71            |
|                  |                                                         | Q9H3D4                     | TP63        | tumor protein p63                                                        | -4.15            |
|                  |                                                         | Q9NZM5                     | NOP53       | NOP53 ribosome biogenesis factor                                         | -1.89            |
|                  | GO:000225<br>adaptive immune response                   | P01579                     | IFNG        | interferon gamma                                                         | -1.41            |
|                  |                                                         | P11226                     | MBL2        | mannose binding lectin 2                                                 | -1.45            |
|                  |                                                         | P20749                     | BCL3        | BCL3, transcription coactivator                                          | -1.44            |
|                  |                                                         | Q5UIP0                     | RIF1        | replication timing regulatory factor 1                                   | -2.53            |
|                  |                                                         | Q7KZ85                     | SUPT6H      | SPT6 homolog, histone chaperone                                          | -1.39            |
|                  |                                                         | Q8N1K5                     | THEMIS      | thymocyte selection associated                                           | -3.12            |
|                  | GO:0038127<br>ERBB signaling pathway                    | O00443                     | PIK3C2A     | phosphatidylinositol-4-phosphate 3-kinase catalytic subunit type 2 alpha | 2.68             |
|                  |                                                         | Q6PJF5                     | RHBDF2      | rhomboid 5 homolog 2                                                     | 3.57             |
|                  |                                                         | Q8TBC3                     | SHKBP1      | SH3KBP1 binding protein 1                                                | 2.02             |
| 48               | GO:0070555<br>response to interleukin-1                 | P38159                     | RBMX        | RNA binding motif protein X-linked                                       | 1.41             |
|                  |                                                         | Q92900                     | UPF1        | UPF1, RNA helicase and ATPase                                            | 1.81             |
|                  |                                                         | Q9HAT8                     | PELI2       | pellino E3 ubiquitin protein ligase family member 2                      | 1.54             |
|                  | GO:0007219<br>Notch signaling pathway                   | P46531                     | NOTCH1      | notch receptor 1                                                         | 1.06             |
|                  |                                                         | Q9BUL8                     | PDCD10      | programmed cell death 10                                                 | 1.54             |
|                  |                                                         | Q9NYJ7                     | DLL3        | delta like canonical Notch ligand 3                                      | 1.29             |
|                  |                                                         | Q9Y4D7                     | PLXND1      | plexin D1                                                                | 2.99             |
|                  | 72                                                      | GO:0097696<br>STAT cascade | P01579      | IFNG                                                                     | interferon gamma |
| P07949           |                                                         |                            | RET         | ret proto-oncogene                                                       | -2.18            |
| P35240           |                                                         |                            | NF2         | neurofibromin 2                                                          | -1.71            |
| P98161           |                                                         |                            | PKD1        | polycystin 1, transient receptor potential channel interacting           | -2.02            |
| Q16619           |                                                         |                            | CTF1        | cardiotrophin 1                                                          | -1.98            |
| Q9Y2H2           |                                                         |                            | INPP5F      | inositol polyphosphate-5-phosphatase F                                   | -2.53            |

**Table S2. Gene ontology of differentially expressed proteins associated with metabolic processes**

| Time point (hpi) | GO                                                      | User ID | Gene symbol | Gene name                                                            | Fold change |
|------------------|---------------------------------------------------------|---------|-------------|----------------------------------------------------------------------|-------------|
| 8                | GO:1901136<br>carbohydrate derivative catabolic process | Q08499  | PDE4D       | phosphodiesterase 4D                                                 | 1.64        |
|                  |                                                         | Q6NSJ0  | MYORG       | myogenesis regulating glycosidase (putative)                         | 1.39        |
|                  |                                                         | Q8N335  | GPD1L       | glycerol-3-phosphate dehydrogenase 1 like                            | 1.50        |
|                  |                                                         | Q8WWQ2  | HPSE2       | heparanase 2 (inactive)                                              | 3.01        |
|                  | GO:0006022<br>aminoglycan metabolic process             | Q7LGC8  | CHST3       | carbohydrate sulfotransferase 3                                      | 3.32        |
|                  |                                                         | Q8IZ52  | CHPF        | chondroitin polymerizing factor                                      | 2.36        |
|                  |                                                         | Q8WWQ2  | HPSE2       | heparanase 2 (inactive)                                              | 3.01        |
|                  | GO:0051117<br>ATPase binding                            | O75348  | ATP6V1G1    | ATPase H <sup>+</sup> transporting V1 subunit G1                     | 1.41        |
|                  |                                                         | Q08499  | PDE4D       | phosphodiesterase 4D                                                 | 1.64        |
|                  |                                                         | Q7LBE3  | SLC26A9     | solute carrier family 26 member 9                                    | 2.28        |
|                  | GO:0046434<br>organophosphate catabolic process         | Q08499  | PDE4D       | phosphodiesterase 4D                                                 | 1.64        |
|                  |                                                         | Q8IY17  | PNPLA6      | patatin like phospholipase domain containing 6                       | 1.74        |
|                  |                                                         | Q8N335  | GPD1L       | glycerol-3-phosphate dehydrogenase 1 like                            | 1.50        |
|                  |                                                         | Q9NY59  | SMPD3       | sphingomyelin phosphodiesterase 3                                    | 1.52        |
|                  | GO:0009100<br>glycoprotein metabolic process            | O60476  | MAN1A2      | mannosidase alpha class 1A member 2                                  | 3.19        |
|                  |                                                         | Q7LGC8  | CHST3       | carbohydrate sulfotransferase 3                                      | 3.32        |
|                  |                                                         | Q8IZ52  | CHPF        | chondroitin polymerizing factor                                      | 2.36        |
|                  |                                                         | Q8NBI6  | XXYL1       | xyloside xylosyltransferase 1                                        | 1.68        |
|                  |                                                         | Q9NQ66  | PLCB1       | phospholipase C beta 1                                               | 1.29        |
|                  |                                                         | Q9NYU2  | UGGT1       | UDP-glucose glycoprotein glucosyltransferase 1                       | 1.76        |
| 24               | GO:0043112<br>receptor metabolic process                | P37840  | SNCA        | synuclein alpha                                                      | -1.54       |
|                  |                                                         | Q68DV7  | RNF43       | ring finger protein 43                                               | -1.41       |
|                  |                                                         | Q86UL8  | MAGI2       | membrane associated guanylate kinase, WW and PDZ domain containing 2 | -1.64       |
|                  |                                                         | Q9Y2H2  | INPP5F      | inositol polyphosphate-5-phosphatase F                               | -1.27       |
|                  | GO:0008202<br>steroid metabolic process                 | O95153  | TSPOAP1     | TSPO associated protein 1                                            | -1.58       |
|                  |                                                         | P05023  | ATP1A1      | ATPase Na <sup>+</sup> /K <sup>+</sup> transporting subunit alpha 1  | -3.09       |
|                  |                                                         | P16234  | PDGFRA      | platelet derived growth factor receptor alpha                        | -1.44       |
|                  |                                                         | Q8WTV0  | SCARB1      | scavenger receptor class B member 1                                  | -1.82       |
|                  |                                                         | Q9H4L5  | OSBPL3      | oxysterol binding protein like 3                                     | -1.54       |

**Table S2. Gene ontology of differentially expressed proteins associated with metabolic processes (Continued)**

| Time point (hpi) | GO                                                      | User ID | Gene symbol | Gene name                                                               | Fold change |
|------------------|---------------------------------------------------------|---------|-------------|-------------------------------------------------------------------------|-------------|
| 24               | GO:0009141<br>nucleoside triphosphate metabolic process | O75081  | CBFA2T3     | CBFA2/RUNX1 translocation partner 3                                     | -2.14       |
|                  |                                                         | P11055  | MYH3        | myosin heavy chain 3                                                    | -1.45       |
|                  |                                                         | P37840  | SNCA        | synuclein alpha                                                         | -1.54       |
|                  |                                                         | P61586  | RHOA        | ras homolog family member A                                             | -1.79       |
|                  |                                                         | Q16795  | NDUFA9      | NADH:ubiquinone oxidoreductase subunit A9                               | -3.18       |
|                  |                                                         | Q9Y2B5  | VPS9D1      | VPS9 domain containing 1                                                | -2.41       |
| 48               | GO:0006644<br>phospholipid metabolic process            | O00750  | PIK3C2B     | phosphatidylinositol-4-phosphate 3-kinase catalytic subunit type 2 beta | 3.59        |
|                  |                                                         | O95427  | PIGN        | phosphatidylinositol glycan anchor biosynthesis class N                 | 1.60        |
|                  |                                                         | P42356  | PI4KA       | phosphatidylinositol 4-kinase alpha                                     | 1.86        |
|                  |                                                         | Q6UWR7  | ENPP6       | ectonucleotide pyrophosphatase/phosphodiesterase 6                      | 1.34        |
|                  |                                                         | Q8WTV0  | SCARB1      | scavenger receptor class B member 1                                     | 1.42        |
|                  |                                                         | Q96PC2  | IP6K3       | inositol hexakisphosphate kinase 3                                      | 1.85        |
|                  |                                                         | Q9BTU6  | PI4K2A      | phosphatidylinositol 4-kinase type 2 alpha                              | 1.31        |
|                  |                                                         |         |             |                                                                         |             |
| 72               | GO:0006766<br>vitamin metabolic process                 | P01579  | IFNG        | interferon gamma                                                        | -1.52       |
|                  |                                                         | P15328  | FOLR1       | folate receptor 1                                                       | -2.2        |
|                  |                                                         | P98164  | LRP2        | LDL receptor related protein 2                                          | -1.27       |
|                  | GO:0043112<br>receptor metabolic process                | O00560  | SDCBP       | syndecan binding protein                                                | -3.48       |
|                  |                                                         | Q86UL8  | MAGI2       | membrane associated guanylate kinase, WW and PDZ domain containing 2    | -1.11       |
|                  |                                                         | Q9P2Y5  | UVRAG       | UV radiation resistance associated                                      | -1.53       |
|                  |                                                         | Q9Y2H2  | INPP5F      | inositol polyphosphate-5-phosphatase F                                  | -2.53       |

**Table S3. Gene ontology of differentially expressed proteins associated with synaptic vesicle and neurotransmitter transports**

| Time point (hpi) | GO                                                  | User ID | Gene symbol | Gene name                                                           | Fold change |
|------------------|-----------------------------------------------------|---------|-------------|---------------------------------------------------------------------|-------------|
| 24               | GO:0035249<br>synaptic transmission, glutamatergic  | P21359  | NF1         | neurofibromin 1                                                     | 1.53        |
|                  |                                                     | P50993  | ATP1A2      | ATPase Na <sup>+</sup> /K <sup>+</sup> transporting subunit alpha 2 | 1.55        |
|                  |                                                     | Q5S007  | LRRK2       | leucine rich repeat kinase 2                                        | 1.50        |
|                  | GO:0006836<br>neurotransmitter transport            | P21359  | NF1         | neurofibromin 1                                                     | 1.53        |
|                  |                                                     | P50993  | ATP1A2      | ATPase Na <sup>+</sup> /K <sup>+</sup> transporting subunit alpha 2 | 1.55        |
|                  |                                                     | P78508  | KCNJ10      | potassium voltage-gated channel subfamily J member 10               | 2.95        |
|                  |                                                     | Q5S007  | LRRK2       | leucine rich repeat kinase 2                                        | 1.50        |
|                  |                                                     | Q6DN14  | MCTP1       | multiple C2 and transmembrane domain containing 1                   | 1.43        |
|                  |                                                     | Q8TCU5  | GRIN3A      | glutamate ionotropic receptor NMDA type subunit 3A                  | 1.86        |
|                  |                                                     | Q9Y6M5  | SLC30A1     | solute carrier family 30 member 1                                   | 1.25        |
|                  |                                                     | Q9Y6V0  | PCLO        | piccolo presynaptic cytomatrix protein                              | 1.26        |
|                  | GO:0006813<br>potassium ion transport               | P50993  | ATP1A2      | ATPase Na <sup>+</sup> /K <sup>+</sup> transporting subunit alpha 2 | 1.55        |
|                  |                                                     | P63165  | SUMO1       | small ubiquitin-like modifier 1                                     | 1.72        |
|                  |                                                     | P78508  | KCNJ10      | potassium voltage-gated channel subfamily J member 10               | 2.95        |
|                  |                                                     | Q92953  | KCNB2       | potassium voltage-gated channel subfamily B member 2                | 1.28        |
|                  | GO:0099504<br>synaptic vesicle cycle                | Q9H4A3  | WNK1        | WNK lysine deficient protein kinase 1                               | 2.18        |
|                  |                                                     | O14939  | PLD2        | phospholipase D2                                                    | 1.55        |
|                  |                                                     | Q5S007  | LRRK2       | leucine rich repeat kinase 2                                        | 1.50        |
|                  |                                                     | Q8TCU5  | GRIN3A      | glutamate ionotropic receptor NMDA type subunit 3A                  | 1.86        |
|                  |                                                     | Q9BY11  | PACSIN1     | protein kinase C and casein kinase substrate in neurons 1           | 1.61        |
|                  |                                                     | Q9Y6V0  | PCLO        | piccolo presynaptic cytomatrix protein                              | 1.26        |
|                  | GO:0001505<br>regulation of neurotransmitter levels | P21359  | NF1         | neurofibromin 1                                                     | 1.53        |
|                  |                                                     | P50993  | ATP1A2      | ATPase Na <sup>+</sup> /K <sup>+</sup> transporting subunit alpha 2 | 1.55        |
|                  |                                                     | P78508  | KCNJ10      | potassium voltage-gated channel subfamily J member 10               | 2.95        |
|                  |                                                     | Q5S007  | LRRK2       | leucine rich repeat kinase 2                                        | 1.50        |
|                  |                                                     | Q6DN14  | MCTP1       | multiple C2 and transmembrane domain containing 1                   | 1.43        |
|                  |                                                     | Q8TCU5  | GRIN3A      | glutamate ionotropic receptor NMDA type subunit 3A                  | 1.86        |
|                  |                                                     | Q9Y6M5  | SLC30A1     | solute carrier family 30 member 1                                   | 1.25        |
|                  |                                                     | Q9Y6V0  | PCLO        | piccolo presynaptic cytomatrix protein                              | 1.26        |

**Table S3. Gene ontology of differentially expressed proteins associated with synaptic vesicle and neurotransmitter transports**  
(Continued)

| Time point (hpi) | GO                                                      | User ID | Gene symbol | Gene name                                                            | Fold change |
|------------------|---------------------------------------------------------|---------|-------------|----------------------------------------------------------------------|-------------|
| 24               | GO:0099177<br>regulation of trans-synaptic signaling    | P21359  | NF1         | neurofibromin 1                                                      | 1.53        |
|                  |                                                         | P50993  | ATP1A2      | ATPase Na+/K+ transporting subunit alpha 2                           | 1.55        |
|                  |                                                         | P78508  | KCNJ10      | potassium voltage-gated channel subfamily J member 10                | 2.95        |
|                  |                                                         | Q5S007  | LRRK2       | leucine rich repeat kinase 2                                         | 1.50        |
|                  |                                                         | Q6DN14  | MCTP1       | multiple C2 and transmembrane domain containing 1                    | 1.43        |
|                  |                                                         | Q8TCU5  | GRIN3A      | glutamate ionotropic receptor NMDA type subunit 3A                   | 1.86        |
|                  |                                                         | Q9Y6M5  | SLC30A1     | solute carrier family 30 member 1                                    | 1.25        |
|                  |                                                         | P27105  | STOM        | stomatin                                                             | 1.52        |
|                  | GO:0034765<br>regulation of ion transmembrane transport | P50993  | ATP1A2      | ATPase Na+/K+ transporting subunit alpha 2                           | 1.55        |
|                  |                                                         | P63165  | SUMO1       | small ubiquitin-like modifier 1                                      | 1.72        |
|                  |                                                         | P78508  | KCNJ10      | potassium voltage-gated channel subfamily J member 10                | 2.95        |
|                  |                                                         | Q8TDI7  | TMC2        | transmembrane channel like 2                                         | 1.88        |
|                  |                                                         | Q92953  | KCNB2       | potassium voltage-gated channel subfamily B member 2                 | 1.28        |
|                  |                                                         | Q9H4A3  | WNK1        | WNK lysine deficient protein kinase 1                                | 2.18        |
|                  |                                                         | Q9Y6M5  | SLC30A1     | solute carrier family 30 member 1                                    | 1.25        |
|                  |                                                         |         |             |                                                                      |             |
|                  | GO:0098793<br>presynapse                                | O14939  | PLD2        | phospholipase D2                                                     | 1.55        |
|                  |                                                         | P11142  | HSPA8       | heat shock protein family A (Hsp70) member 8                         | 1.15        |
|                  |                                                         | P21359  | NF1         | neurofibromin 1                                                      | 1.53        |
|                  |                                                         | P78508  | KCNJ10      | potassium voltage-gated channel subfamily J member 10                | 2.95        |
|                  |                                                         | Q16849  | PTPRN       | protein tyrosine phosphatase, receptor type N                        | 2.99        |
|                  |                                                         | Q5S007  | LRRK2       | leucine rich repeat kinase 2                                         | 1.50        |
|                  |                                                         | Q6DN14  | MCTP1       | multiple C2 and transmembrane domain containing 1                    | 1.43        |
|                  |                                                         | Q99726  | SLC30A3     | solute carrier family 30 member 3                                    | 1.86        |
|                  |                                                         | Q9BY11  | PACSIN1     | protein kinase C and casein kinase substrate in neurons 1            | 1.61        |
|                  |                                                         | Q9Y6V0  | PCLO        | piccolo presynaptic cytomatrix protein                               | 1.26        |
|                  |                                                         |         |             |                                                                      |             |
| 48               | GO:0099504<br>synaptic vesicle cycle                    | O14917  | PCDH17      | protocadherin 17                                                     | -2.35       |
|                  |                                                         | P29274  | ADORA2A     | adenosine A2a receptor                                               | -3.91       |
|                  |                                                         | Q15075  | EEA1        | early endosome antigen 1                                             | -3.90       |
|                  |                                                         | Q86UL8  | MAGI2       | membrane associated guanylate kinase, WW and PDZ domain containing 2 | -2.39       |

**Table S3. Gene ontology of differentially expressed proteins associated with synaptic vesicle and neurotransmitter transports**  
(Continued)

| Time point (hpi) | GO                                                                | User ID | Gene symbol | Gene name                                                            | Fold change |
|------------------|-------------------------------------------------------------------|---------|-------------|----------------------------------------------------------------------|-------------|
| 48               | GO:0051648<br>vesicle localization                                | O14917  | PCDH17      | protocadherin 17                                                     | -2.35       |
|                  |                                                                   | P12259  | F5          | coagulation factor V                                                 | -2.07       |
|                  |                                                                   | P15328  | FOLR1       | folate receptor 1                                                    | -2.35       |
|                  |                                                                   | P29274  | ADORA2A     | adenosine A2a receptor                                               | -3.91       |
|                  |                                                                   | P54257  | HAP1        | huntingtin associated protein 1                                      | -1.38       |
|                  |                                                                   | Q86UL8  | MAGI2       | membrane associated guanylate kinase, WW and PDZ domain containing 2 | -2.39       |
|                  | GO:0051271:<br>negative regulation of cellular component movement | Q9BZH6  | WDR11       | WD repeat domain 11                                                  | -1.94       |
|                  |                                                                   | O94813  | SLIT2       | slit guidance ligand 2                                               | -1.43       |
|                  |                                                                   | P21359  | NF1         | neurofibromin 1                                                      | -1.55       |
|                  |                                                                   | P35240  | NF2         | neurofibromin 2                                                      | -1.90       |
|                  |                                                                   | P78563  | ADARB1      | adenosine deaminase, RNA specific B1                                 | -3.11       |
|                  |                                                                   | Q6DN14  | MCTP1       | multiple C2 and transmembrane domain containing 1                    | -1.97       |
|                  | GO:0099177<br>regulation of trans-synaptic signaling              | Q86SQ0  | PHLDB2      | pleckstrin homology like domain family B member 2                    | -1.57       |
|                  |                                                                   | Q86UL8  | MAGI2       | membrane associated guanylate kinase, WW and PDZ domain containing 2 | -2.39       |
|                  |                                                                   | Q9NS66  | GPR173      | G protein-coupled receptor 173                                       | -2.51       |
|                  |                                                                   | O14917  | PCDH17      | protocadherin 17                                                     | -2.35       |
|                  |                                                                   | P21359  | NF1         | neurofibromin 1                                                      | -1.55       |
|                  |                                                                   | P24043  | LAMA2       | laminin subunit alpha 2                                              | -1.43       |
| 72               | GO:0021915<br>neural tube development                             | P29274  | ADORA2A     | adenosine A2a receptor                                               | -3.91       |
|                  |                                                                   | P54257  | HAP1        | huntingtin associated protein 1                                      | -1.38       |
|                  |                                                                   | P56373  | P2RX3       | purinergic receptor P2X 3                                            | -3.40       |
|                  |                                                                   | Q6DN14  | MCTP1       | multiple C2 and transmembrane domain containing 1                    | -1.97       |
|                  |                                                                   | P15328  | FOLR1       | folate receptor 1                                                    | -2.20       |
|                  |                                                                   | P50552  | VASP        | vasodilator stimulated phosphoprotein                                | -1.38       |
|                  |                                                                   | P98161  | PKD1        | polycystin 1, transient receptor potential channel interacting       | -2.02       |
|                  |                                                                   | P98164  | LRP2        | LDL receptor related protein 2                                       | -1.27       |
|                  |                                                                   | Q96Q89  | KIF20B      | kinesin family member 20B                                            | -1.47       |
|                  |                                                                   | Q96RY7  | IFT140      | intraflagellar transport 140                                         | -1.37       |

**Table S3. Gene ontology of differentially expressed proteins associated with synaptic vesicle and neurotransmitter transports**  
(Continued)

| Time point (hpi) | GO                                                                 | User ID | Gene symbol | Gene name                                                           | Fold change |
|------------------|--------------------------------------------------------------------|---------|-------------|---------------------------------------------------------------------|-------------|
| 72               | GO:0043025<br>neuronal cell body                                   | P05111  | INHA        | inhibin subunit alpha                                               | 0.94        |
|                  |                                                                    | P29274  | ADORA2A     | adenosine A2a receptor                                              | 1.95        |
|                  |                                                                    | P57771  | RGS8        | regulator of G protein signaling 8                                  | 4.76        |
|                  |                                                                    | Q66K74  | MAP1S       | microtubule associated protein 1S                                   | 1.76        |
|                  |                                                                    | Q8NER1  | TRPV1       | transient receptor potential cation channel subfamily V member 1    | 2.28        |
|                  |                                                                    | Q92953  | KCNB2       | potassium voltage-gated channel subfamily B member 2                | 1.49        |
|                  | GO:0050906<br>detection of stimulus involved in sensory perception | Q9BTU6  | PI4K2A      | phosphatidylinositol 4-kinase type 2 alpha                          | 2.93        |
|                  |                                                                    | Q8NER1  | TRPV1       | transient receptor potential cation channel subfamily V member 1    | 2.281       |
|                  |                                                                    | Q8NH74  | OR10A6      | olfactory receptor family 10 subfamily A member 6 (gene/pseudogene) | 1.178       |
|                  |                                                                    | Q8WVG9  | ADGRV1      | adhesion G protein-coupled receptor V1                              | 2.26        |
|                  |                                                                    | Q9H5I5  | PIEZO2      | piezo type mechanosensitive ion channel component 2                 | 1.69        |
|                  |                                                                    | Q9P0L9  | PKD2L1      | polycystin 2 like 1, transient receptor potential cation channel    | 1.19        |



**Table S4. Gene ontology of differentially expressed proteins associated with organelle and cytoskeleton organization**

| Time point (hpi) | GO                                                            | User ID | Gene symbol | Gene name                                                            | Fold change |
|------------------|---------------------------------------------------------------|---------|-------------|----------------------------------------------------------------------|-------------|
| 48               | GO:0045111 intermediate filament cytoskeleton                 | P02545  | LMNA        | lamin A/C                                                            | -2.20       |
|                  |                                                               | P08727  | KRT19       | keratin 19                                                           | -1.79       |
|                  |                                                               | P13645  | KRT10       | keratin 10                                                           | -2.07       |
|                  |                                                               | P29274  | ADORA2A     | adenosine A2a receptor                                               | -3.91       |
|                  |                                                               | P35527  | KRT9        | keratin 9                                                            | -3.02       |
|                  |                                                               | P48668  | KRT6C       | keratin 6C                                                           | -2.24       |
|                  |                                                               | Q86SQ0  | PHLDB2      | pleckstrin homology like domain family B member 2                    | -1.57       |
|                  |                                                               | Q9H307  | PNN         | pinin, desmosome associated protein                                  | -2.73       |
|                  |                                                               |         |             |                                                                      |             |
|                  |                                                               |         |             |                                                                      |             |
|                  | GO:0051271 negative regulation of cellular component movement | O94813  | SLIT2       | slit guidance ligand 2                                               | -1.43       |
|                  |                                                               | P21359  | NF1         | neurofibromin 1                                                      | -1.55       |
|                  |                                                               | P35240  | NF2         | neurofibromin 2                                                      | -1.90       |
|                  |                                                               | P78563  | ADARB1      | adenosine deaminase, RNA specific B1                                 | -3.11       |
|                  |                                                               | Q6DN14  | MCTP1       | multiple C2 and transmembrane domain containing 1                    | -1.97       |
|                  |                                                               | Q86SQ0  | PHLDB2      | pleckstrin homology like domain family B member 2                    | -1.57       |
|                  |                                                               | Q86UL8  | MAGI2       | membrane associated guanylate kinase, WW and PDZ domain containing 2 | -2.39       |
|                  |                                                               | Q9NS66  | GPR173      | G protein-coupled receptor 173                                       | -2.51       |
|                  | GO:0040013 negative regulation of locomotion                  | O94813  | SLIT2       | slit guidance ligand 2                                               | -1.43       |
|                  |                                                               | P21359  | NF1         | neurofibromin 1                                                      | -1.55       |
|                  |                                                               | P29274  | ADORA2A     | adenosine A2a receptor                                               | -3.91       |
|                  |                                                               | P35240  | NF2         | neurofibromin 2                                                      | -1.90       |
|                  |                                                               | P78563  | ADARB1      | adenosine deaminase, RNA specific B1                                 | -3.11       |
|                  |                                                               | Q6DN14  | MCTP1       | multiple C2 and transmembrane domain containing 1                    | -1.97       |
|                  |                                                               | Q86SQ0  | PHLDB2      | pleckstrin homology like domain family B member 2                    | -1.57       |
|                  |                                                               | Q86UL8  | MAGI2       | membrane associated guanylate kinase, WW and PDZ domain containing 2 | -2.39       |
|                  |                                                               | Q9NS66  | GPR173      | G protein-coupled receptor 173                                       | -2.51       |
|                  | GO:0010639 negative regulation of organelle organization      | O94813  | SLIT2       | slit guidance ligand 2                                               | -1.43       |
|                  |                                                               | P02545  | LMNA        | lamin A/C                                                            | -2.20       |
|                  |                                                               | P09327  | VIL1        | villin 1                                                             | -1.05       |
|                  |                                                               | P11277  | SPTB        | spectrin beta, erythrocytic                                          | -1.77       |
|                  |                                                               | P16401  | HIST1H1B    | histone cluster 1 H1 family member b                                 | -1.61       |
|                  |                                                               | P49815  | TSC2        | TSC complex subunit 2                                                | -1.05       |
|                  |                                                               | Q7KZ85  | SUPT6H      | SPT6 homolog, histone chaperone                                      | -1.15       |
|                  |                                                               | Q86SQ0  | PHLDB2      | pleckstrin homology like domain family B member 2                    | -1.57       |
|                  |                                                               | Q8NFM7  | TET1        | tet methylcytosine dioxygenase 1                                     | -1.78       |
|                  |                                                               | Q9UBC3  | DNMT3B      | DNA methyltransferase 3 beta                                         | -1.28       |

**Table S4. Gene ontology of differentially expressed proteins associated with organelle and cytoskeleton organization (Continued)**

| Time point (hpi) | GO                                                             | User ID | Gene symbol | Gene name                                              | Fold change |
|------------------|----------------------------------------------------------------|---------|-------------|--------------------------------------------------------|-------------|
| 72               | GO:0031023<br>microtubule<br>organizing center<br>organization | O75116  | ROCK2       | Rho associated coiled-coil containing protein kinase 2 | -2.15       |
|                  |                                                                | P53350  | PLK1        | polo like kinase 1                                     | -1.34       |
|                  |                                                                | Q8NEM0  | MCPH1       | microcephalin 1                                        | -1.31       |
|                  |                                                                | Q9NPB6  | PARD6A      | par-6 family cell polarity regulator alpha             | -2.84       |
|                  |                                                                | Q9P2Y5  | UVRAG       | UV radiation resistance associated                     | -1.53       |
|                  | GO:0045111<br>intermediate<br>filament<br>cytoskeleton         | P08727  | KRT19       | keratin 19                                             | 1.48        |
|                  |                                                                | P14923  | JUP         | junction plakoglobin                                   | 1.94        |
|                  |                                                                | P29274  | ADORA2A     | adenosine A2a receptor                                 | 1.95        |
|                  |                                                                | P48668  | KRT6C       | keratin 6C                                             | 1.66        |
|                  |                                                                | Q03252  | LMNB2       | lamin B2                                               | 3.41        |
|                  |                                                                | Q92540  | SMG7        | SMG7, nonsense mediated mRNA decay factor              | 1.75        |

**Table S5. Gene ontology of differentially expressed proteins associated with cell stress and DNA damage response**

| Time point (hpi) | GO                                                                                               | User ID | Gene symbol | Gene name                                                           | Fold change |
|------------------|--------------------------------------------------------------------------------------------------|---------|-------------|---------------------------------------------------------------------|-------------|
| 48               | GO:0071496 cellular response to external stimulus                                                | P05023  | ATP1A1      | ATPase Na <sup>+</sup> /K <sup>+</sup> transporting subunit alpha 1 | -1.55       |
|                  |                                                                                                  | P09529  | INHBB       | inhibin subunit beta B                                              | -2.44       |
|                  |                                                                                                  | P11142  | HSPA8       | heat shock protein family A (Hsp70) member 8                        | -1.45       |
|                  |                                                                                                  | P15328  | FOLR1       | folate receptor 1                                                   | -2.35       |
|                  |                                                                                                  | P56373  | P2RX3       | purinergic receptor P2X 3                                           | -3.40       |
|                  |                                                                                                  | Q1RMZ1  | BMT2        | base methyltransferase of 25S rRNA 2 homolog                        | -5.14       |
|                  |                                                                                                  | Q8NER1  | TRPV1       | transient receptor potential cation channel subfamily V member 1    | -1.57       |
|                  | GO:0042769 DNA damage response, detection of DNA damage<br>GO:0031072 heat shock protein binding | Q99836  | MYD88       | MYD88, innate immune signal transduction adaptor                    | -1.72       |
|                  |                                                                                                  | P35251  | RFC1        | replication factor C subunit 1                                      | 1.56        |
|                  |                                                                                                  | P82673  | MRPS35      | mitochondrial ribosomal protein S35                                 | 1.60        |
|                  |                                                                                                  | O75460  | ERN1        | endoplasmic reticulum to nucleus signaling 1                        | 2.15        |
|                  |                                                                                                  | P04150  | NR3C1       | nuclear receptor subfamily 3 group C member 1                       | 1.20        |
|                  |                                                                                                  | P31948  | STIP1       | stress induced phosphoprotein 1                                     | 2.09        |
|                  |                                                                                                  |         |             |                                                                     |             |
| 72               | GO:0000793 condensed chromosome                                                                  | O15457  | MSH4        | mutS homolog 4                                                      | 2.56        |
|                  |                                                                                                  | O95229  | ZWINT       | ZW10 interacting kinetochore protein                                | 2.62        |
|                  |                                                                                                  | Q14683  | SMC1A       | structural maintenance of chromosomes 1A                            | 1.41        |
|                  |                                                                                                  | Q8IZU3  | SYCP3       | synaptonemal complex protein 3                                      | 3.13        |
|                  |                                                                                                  | Q92878  | RAD50       | RAD50 double strand break repair protein                            | 1.73        |
|                  |                                                                                                  | Q96EA4  | SPDL1       | spindle apparatus coiled-coil protein 1                             | 1.41        |

**Table S6. Gene ontology of differentially expressed proteins associated with endocytosis**

| Time point (hpi)                   | GO                                          | User ID | Gene symbol                                                          | Gene name                                                            | Fold change |
|------------------------------------|---------------------------------------------|---------|----------------------------------------------------------------------|----------------------------------------------------------------------|-------------|
| 24                                 | GO:0005905<br>clathrin-coated pit           | O00291  | HIP1                                                                 | huntingtin interacting protein 1                                     | -3.98       |
|                                    |                                             | Q01968  | OCRL                                                                 | OCRL, inositol polyphosphate-5-phosphatase                           | -2.99       |
|                                    |                                             | Q9Y2H2  | INPP5F                                                               | inositol polyphosphate-5-phosphatase F                               | -1.27       |
|                                    | GO:0031970<br>organelle envelope lumen      | P07437  | TUBB                                                                 | tubulin beta class I                                                 | -1.16       |
|                                    |                                             | P37840  | SNCA                                                                 | synuclein alpha                                                      | -1.54       |
|                                    |                                             | Q12931  | TRAP1                                                                | TNF receptor associated protein 1                                    | -3.25       |
|                                    | GO:0038024<br>cargo receptor activity       | O00291  | HIP1                                                                 | huntingtin interacting protein 1                                     | -3.98       |
|                                    |                                             | Q5KU26  | COLEC12                                                              | collectin subfamily member 12                                        | -1.56       |
|                                    |                                             | Q8WTV0  | SCARB1                                                               | scavenger receptor class B member 1                                  | -1.82       |
|                                    |                                             | Q9UP52  | TFR2                                                                 | transferrin receptor 2                                               | -2.62       |
|                                    | GO:0030139<br>endocytic vesicle             | O00291  | HIP1                                                                 | huntingtin interacting protein 1                                     | -3.98       |
|                                    |                                             | Q01968  | OCRL                                                                 | OCRL, inositol polyphosphate-5-phosphatase                           | -2.99       |
|                                    |                                             | Q12965  | MYO1E                                                                | myosin IE                                                            | -2.64       |
|                                    |                                             | Q5KU26  | COLEC12                                                              | collectin subfamily member 12                                        | -1.56       |
|                                    |                                             | Q8WTV0  | SCARB1                                                               | scavenger receptor class B member 1                                  | -1.82       |
|                                    |                                             | Q9Y2H2  | INPP5F                                                               | inositol polyphosphate-5-phosphatase F                               | -1.27       |
|                                    |                                             | Q9Y4G8  | RAPGEF2                                                              | Rap guanine nucleotide exchange factor 2                             | -2.26       |
|                                    | GO:0006898<br>receptor-mediated endocytosis | O00291  | HIP1                                                                 | huntingtin interacting protein 1                                     | -3.98       |
|                                    |                                             | P37840  | SNCA                                                                 | synuclein alpha                                                      | -1.54       |
|                                    |                                             | Q5KU26  | COLEC12                                                              | collectin subfamily member 12                                        | -1.56       |
|                                    |                                             | Q86UL8  | MAGI2                                                                | membrane associated guanylate kinase, WW and PDZ domain containing 2 | -1.64       |
|                                    |                                             | Q8WTV0  | SCARB1                                                               | scavenger receptor class B member 1                                  | -1.82       |
|                                    |                                             | Q9UP52  | TFR2                                                                 | transferrin receptor 2                                               | -2.62       |
|                                    |                                             | Q9Y2H2  | INPP5F                                                               | inositol polyphosphate-5-phosphatase F                               | -1.27       |
| GO:0051648<br>vesicle localization |                                             | O14917  | PCDH17                                                               | protocadherin 17                                                     | -2.35       |
|                                    |                                             | P12259  | F5                                                                   | coagulation factor V                                                 | -2.07       |
|                                    | P15328                                      | FOLR1   | folate receptor 1                                                    | -2.35                                                                |             |
|                                    | P29274                                      | ADORA2A | adenosine A2a receptor                                               | -3.91                                                                |             |
|                                    | P54257                                      | HAP1    | huntingtin associated protein 1                                      | -1.38                                                                |             |
|                                    | Q86UL8                                      | MAGI2   | membrane associated guanylate kinase, WW and PDZ domain containing 2 | -2.39                                                                |             |
|                                    | Q9BZH6                                      | WDR11   | WD repeat domain 11                                                  | -1.94                                                                |             |
|                                    |                                             |         |                                                                      |                                                                      |             |

**Table S6. Gene ontology of differentially expressed proteins associated with endocytosis (*continued*)**

| Time point (hpi) | GO                          | User ID | Gene symbol | Gene name                                                            | Fold change |
|------------------|-----------------------------|---------|-------------|----------------------------------------------------------------------|-------------|
| 72               | GO:0005770<br>late endosome | P11142  | HSPA8       | heat shock protein family A (Hsp70) member 8                         | -2.14       |
|                  |                             | Q86UL8  | MAGI2       | membrane associated guanylate kinase, WW and PDZ domain containing 2 | -1.11       |
|                  |                             | Q86VX9  | MON1A       | MON1 homolog A, secretory trafficking associated                     | -2.88       |
|                  |                             | Q8IYI6  | EXOC8       | exocyst complex component 8                                          | -2.59       |
|                  |                             | Q8IZK6  | MCOLN2      | mucolipin 2                                                          | -2.55       |
|                  |                             | Q9P2Y5  | UVRAG       | UV radiation resistance associated                                   | -1.53       |

**Table S7. Primers for quantitative RT-PCR**

| <b>Target</b>        | <b>Forward Primer (5'-3')</b> | <b>Reverse Primer (5'-3')</b> |
|----------------------|-------------------------------|-------------------------------|
| CD44                 | CTCCAGTGAAAGGAGCAGC           | AGCAGGGATTCTGTCTGTG           |
| DCX                  | AAGCTTAGGTGCCTGCGTTA          | AAGGGGCACTTGTGTTTGTC          |
| GFAP                 | GTACCAGGACCTGCTCAAT           | CAACTATCCTGCTTCTGCTC          |
| GJA1                 | GTGACTGGAGCGCCTTAG            | CGCACATGAGAGATTGGGA           |
| Musashi-1            | GAGACTGACGCGCCCCAGCC          | CGCCTGGTCCATGAAAGTGACG        |
| NCAM                 | GCCAGGAGACAGAAACGAAG          | GGTGTGGAAATGCTCTGGT           |
| Nestin               | CAGCGTTGGAACAGAGGTTGG         | TGGCACAGGTGTCTCAAGGGTAG       |
| OLIG1                | GCATCCAGTGTTCCCGATTTAC        | TGCCAGTTAAATTCGGCTACTAC       |
| OLIG2                | CAGAAGCGCTGATGGTCATA          | TCGGCAGTTTTGGGTATTTC          |
| PSD95                | CCACTCTGACAGTGAGACC           | CGTCACTGTCTCGTAGCTC           |
| RTN1                 | GGGCATCGTGTTTGGA              | CTCTTAGCGCCTGGGATT            |
| SOX2                 | ACACCAATCCCATCCACACT          | GCAAACCTCCTGCAAAGCTC          |
| STMN2                | GCTCTTGCTTTTACCCGGAAC         | ATTGTTTCAGCACCTGGGC           |
| Syn1                 | GGAGAAATTGACATTAAAGTAGAACAG   | CTTCTGTCCCCAGTTTCTTATGC       |
| $\beta$ -tubulin III | CAACAGCACGGCCATCCAGG          | CTTGGGGCCCTGGGCCTCCGA         |
